# Supplementary material for: Fluoride-free synthesis of beta zeolite with enrichment of polymorph B from a solvent-free route
Source: Royal Society of Chemistry journal article supplement (doi:10.1039/d2dt00011c), 2022-01-01
Supplement: d2dt00011c1.pdf [file d2dt00011c1.pdf]

## Electronic Supplementary Information

### Fluoride-Free Synthesis of Beta Zeolite with Enrichment of Polymorph B from a Solvent-Free Route

Xiyuan Yu,<sup>a</sup> Shengshen Meng,<sup>a</sup> Shuqi Liu,<sup>a</sup> Yuhan Yang,<sup>a</sup> Baogang Liu,<sup>b</sup> Longfeng Zhu,<sup>\*a</sup> and Xuebo Cao<sup>\*a</sup>

<sup>a</sup> College of Biological, Chemical Science and Engineering, Jiaxing University,  
Jiaxing 314001, China

<sup>b</sup> Huaian Liuyuanhuan New Material Co., LTD, Huaian 211751, China.

\* Corresponding author. E-mail: zhulf1988@mail.zjxu.edu.cn; xbcdo@zjxu.edu.cn

## Experimental Section

### Materials

Sodium hydroxide (AR, 96%, Sinopharm Chemical Reagent Co., Ltd.), sodium aluminate (Sinopharm Chemical Reagent Co., Ltd.), solid silica gel (Qingdao Haiyang Chemical Reagent Co., Ltd.), tetraethylammonium bromide (AR, 98%, Aladdin Chemistry Co., Ltd.), tetraethylammonium hydroxide (*ca.* 35 wt.%, provided by Kente), ammonium nitrate (NH<sub>4</sub>NO<sub>3</sub>, AR, 99%, Beijing Chemical Reagent Co., Ltd.) were used without further purification.

### Syntheses of samples

In a typical run for the synthesis of pure silica Beta zeolite with enrichment of

polymorph B, 3.2 g of SiO<sub>2</sub>, 0.6 g of NaOH, 2.0 g of TEABr, 2.2 g of TEAOH and 0.08 g of seeds were added into a mortar one by one and mixed together. After grinding for 5 minutes, the powder was transferred to an autoclave and sealed. After heating at 140 °C for 5 d, the sample was fully crystalline. This sample was designated as JXM-1 (Jiaxing Material No. 1). Notably, original seed crystals are synthesized from the recent literature (*Catal. Today*, **2020**, 339, 174). Once the JXM-1 is synthesized, the obtained JXM-1 could also be used as seed crystals.

In a typical run for the synthesis of aluminosilicate Beta zeolite with enrichment of polymorph B, 3.2 g of SiO<sub>2</sub>, 0.04 g of NaAlO<sub>2</sub>, 0.6 g of NaOH, 2.0 g of TEABr, 2.2 g of TEAOH and 0.08 g of seeds were added into a mortar one by one and mixed together. After grinding for 5 minutes, the powder was transferred to an autoclave and sealed. After heating at 140 °C for 5 d, the sample was fully crystalline. This sample was designated as Al-JXM-1 (Jiaxing Material No. 1).

## Characterization

X-ray powder diffraction (XRD) patterns were measured with a Rigaku Ultimate VI X-ray diffractometer (40 kV, 40 mA) using CuK $\alpha$  ( $\lambda$ =1.5406 Å) radiation. The N<sub>2</sub> sorption isotherms at the temperature of liquid nitrogen were measured using Micromeritics ASAP 2020M. The sample composition was determined by inductively coupled plasma-atomic emission spectrometry (ICP-AES) with a Perkin-Elmer 8000 OES. Transmission electron microscopy (TEM) images were performed on a JEM-2100F electron microscopy (JEOL, Japan) with an acceleration voltage of 200 kV. Scanning electron microscopy (SEM) experiments were performed on Hitachi SU-1510 electron microscopes. <sup>29</sup>Si, <sup>13</sup>C, and <sup>27</sup>Al MAS NMR spectra were recorded on a Bruker AVANCEIII 500WB spectrometer.

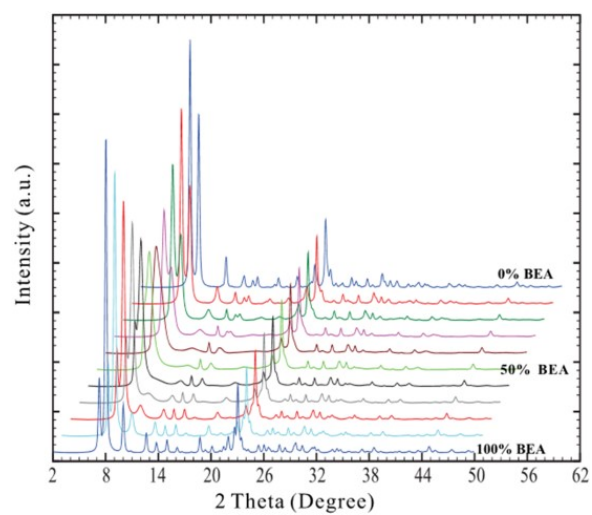

**Figure S1.** Simulated PXRD patterns of Beta zeolite with different ratios of polymorphs A/B.

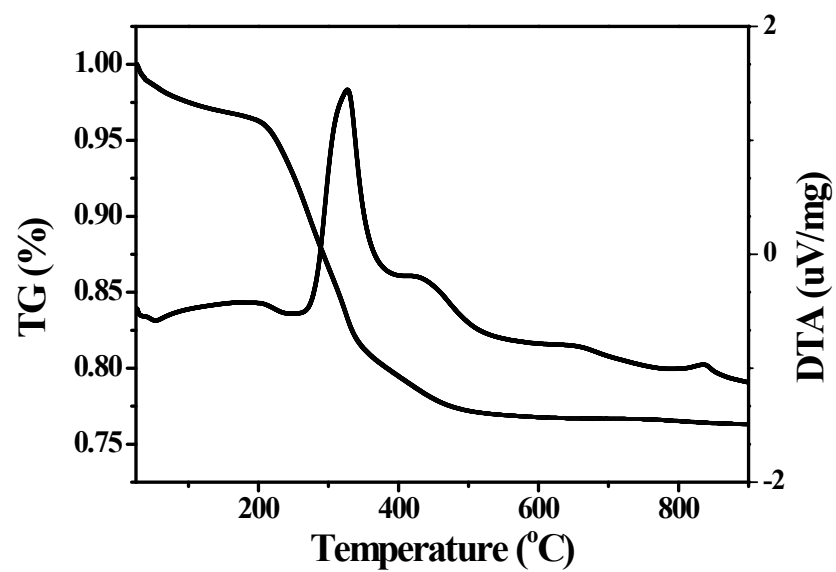

**Figure S2.** TG-DTA curves of as-synthesized JXM-1 sample.

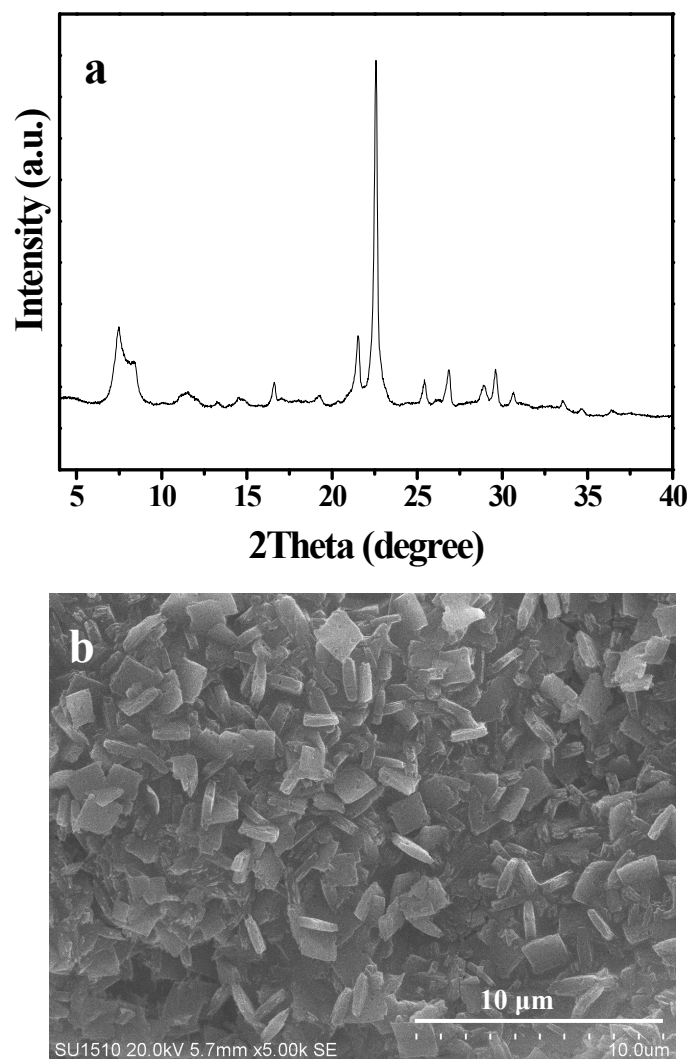

**Figure S3.** (a) XRD pattern and (b) SEM image of as-synthesized Al-JXM-1 sample with a Si/Al ratio of 72.

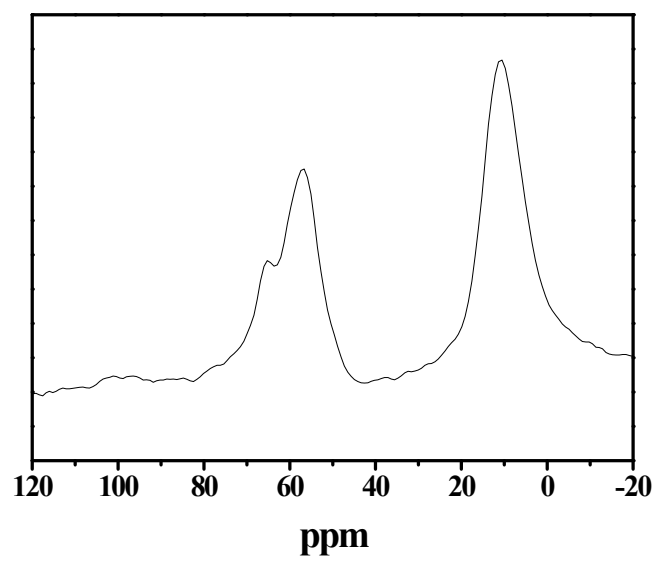

**Figure S4.**  $^{27}\text{Al}$  MAS NMR spectrum of Al-JXM-1 sample.

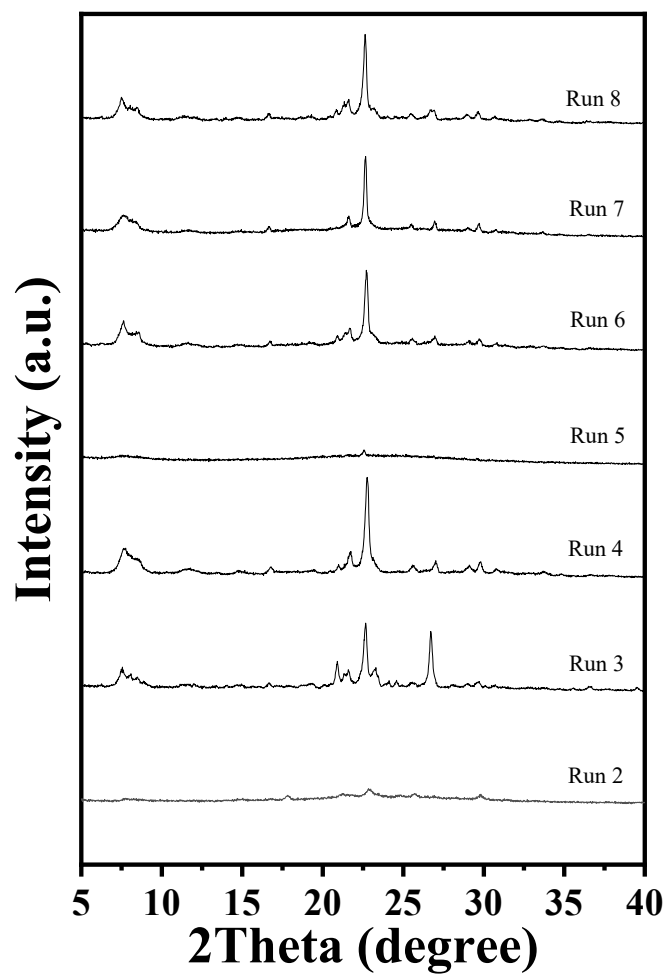

**Figure S5.** XRD patterns of as-synthesized samples in Run 2-8 of Table 1 under various conditions.

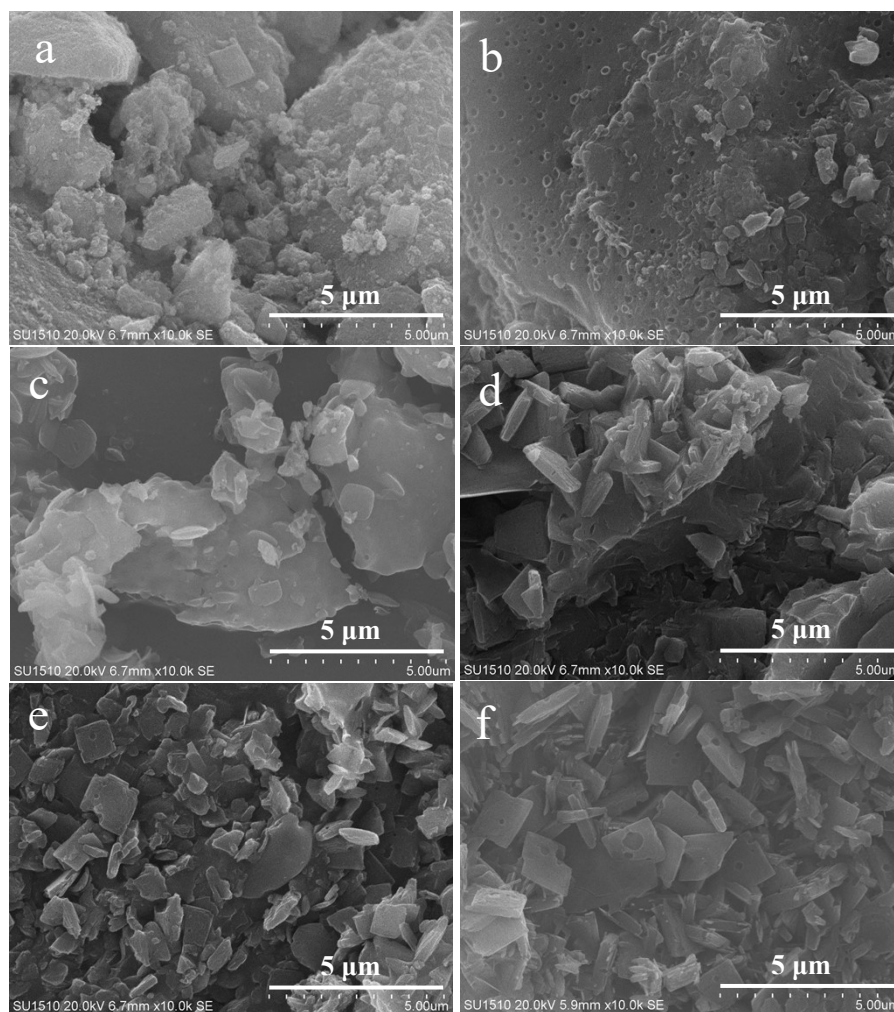

**Figure S6.** SEM images of JXM-1 samples crystallized for (a) 0, (b) 1, (c) 2, (d) 2.5, (e) 3, and (h) 5 d, respectively.
